# Supplementary material for: The role of early colonoscopy in patients presenting with acute lower gastrointestinal bleeding: a systematic review and meta-analysis
Source: PubMed Central journal article supplement — Ther Adv Gastroenterol. 2018 Feb 19;11:1756283X18757184. doi: 10.1177/1756283X18757184 (PMC5821297; doi:10.1177/1756283x18757184), 2018-02-19
Supplement: Supplementary_Material.pdf [file Supplementary_Material.pdf]

Supplement Table 1 – Included study characteristics

| Study<br>Country<br>Type of study<br>Quality score            | Patient population                      | Early colonoscopy                                                                                                                                            | Control                                                  | Definition of rebleeding                                                                                                                                                                                                                                                                                                          |
|---------------------------------------------------------------|-----------------------------------------|--------------------------------------------------------------------------------------------------------------------------------------------------------------|----------------------------------------------------------|-----------------------------------------------------------------------------------------------------------------------------------------------------------------------------------------------------------------------------------------------------------------------------------------------------------------------------------|
| <b>Randomised controlled trials</b>                           |                                         |                                                                                                                                                              |                                                          |                                                                                                                                                                                                                                                                                                                                   |
| Green et al., 2005 <sup>1</sup><br>(USA)<br>RCT               | Acute LGIB                              | < 8 hours of hospitalization for the diagnosis of hematochezia                                                                                               | Standard of care*                                        | Hematochezia developing after index colonoscopy or angiography was defined as that occurring after clinical cessation of the index bleeding event                                                                                                                                                                                 |
| Laine et al., 2010 <sup>2</sup><br>(USA)<br>RCT               | LGIB                                    | < 12 hours after presentation                                                                                                                                | Elective colonoscopy<br>(36-60 hours after presentation) | Hematochezia persisting for > 24 h, recurrent hematochezia after initial resolution of hematochezia (e.g., brown stool followed by recurrent hematochezia), heart rate > 100 beats/ min or systolic blood pressure < 100 mm Hg after hemodynamic stability for ≥ 1 h, or hemoglobin drop > 2 g/ dl after stable hemoglobin values |
| <b>Prospective studies</b>                                    |                                         |                                                                                                                                                              |                                                          |                                                                                                                                                                                                                                                                                                                                   |
| Jensen et al., 2000 <sup>3</sup><br>(USA)<br>Jadad score: 8   | Severe hematochezia and diverticulosis* | 6-12 hours after hospitalization or the diagnosis of hematochezia and within 1 hour after clearance of stool, blood, and clots, as documented by a physician | Medical or surgical treatment                            | Not specified                                                                                                                                                                                                                                                                                                                     |
| Repaka et al., 2012 <sup>4</sup><br>(USA)<br>Jadad score: n/a | Severe Lower GI Bleeding                | 6-24 hours of bloody bowel movement                                                                                                                          | None                                                     | Maroon or red blood from the rectum after a 24 hour period of no observed bleeding associated with a 5% drop in hematocrit or recurrence of hemodynamic instability                                                                                                                                                               |

|                                                                |                                          |                                                                                                                                                                             |                                                                         |                                                                                                                                                                                                                           |
|----------------------------------------------------------------|------------------------------------------|-----------------------------------------------------------------------------------------------------------------------------------------------------------------------------|-------------------------------------------------------------------------|---------------------------------------------------------------------------------------------------------------------------------------------------------------------------------------------------------------------------|
| Albeldawi et al., 2014 <sup>5</sup><br>(USA)<br>Jadad score: 8 | Acute lower GI bleeding                  | ≤ 24 hours of admission                                                                                                                                                     | Elective endoscopy (>24 hours)                                          | Bleeding occurring after colonoscopy and clinical cessation of index bleeding event during the hospitalization                                                                                                            |
| Berrozpe et al., 2010<br>**<br>Abstract<br>Jadad score: n/a    | Lower gastrointestinal bleeding          | ≤ 24 hours of admission                                                                                                                                                     | None                                                                    | Rectal bleeding together with decrease in hematocrit of ≥20% and/or additional blood transfusions, and/or readmission due to the same condition within 1 week of discharge                                                |
| <b>Retrospective studies</b>                                   |                                          |                                                                                                                                                                             |                                                                         |                                                                                                                                                                                                                           |
| Ohyama et al., 2000<br>(Japan)<br>Jadad score: n/a             | Acute hematochezia                       | ≤ 24 hours (after bleeding episode)                                                                                                                                         | None                                                                    | Not specified                                                                                                                                                                                                             |
| Angtuaco et al., 2001 <sup>6</sup><br>(USA)<br>Jadad score: 8  | Acute lower GI tract bleeding            | ≤ 24 hours of admission                                                                                                                                                     | No colonoscopy                                                          | Not specified                                                                                                                                                                                                             |
| Bloomfeld et al., 2001 <sup>7</sup> (USA)<br>Jadad score: n/a  | Diverticular hemorrhage                  | Included as per definition above:<br>* Colonoscopy was performed within 24 hours of presentation in nine patients and between 24-72 hours of presentation in three patients | None                                                                    | Early rebleeding was defined as clinical evidence of recurrent lower GI hemorrhage, and was deemed to be present if the patient had one or more episodes of bright red blood per rectum within 30 days of the index bleed |
| Strate et al., 2003<br>(USA)<br>Jadad score: 8                 | Acute LGIB (excluded small bowel source) | <12 hours from admission and 12-24 hours from admission                                                                                                                     | Colonoscopy (24-48 hours) and colonoscopy (>48 hours)<br>No colonoscopy | Blood per rectum after 24 h of stability accompanied by a drop in Hct of at least 20%, and/or a requirement of additional blood transfusions.                                                                             |
| Strate et al., 2005 <sup>8</sup><br>(USA)<br>Jadad score: 9    | Acute lower intestinal bleeding          | ≤ 24 hours of admission                                                                                                                                                     | Radiographic evaluation                                                 | Bleeding occurring after 24 hours without evidence of bleeding that resulted in additional blood transfusions, and/or a further                                                                                           |

|                                                                   |                                           |                                                                                                                                                                                                                                                                                                  |                                                                                            |                                                                                                                                                                                                                       |
|-------------------------------------------------------------------|-------------------------------------------|--------------------------------------------------------------------------------------------------------------------------------------------------------------------------------------------------------------------------------------------------------------------------------------------------|--------------------------------------------------------------------------------------------|-----------------------------------------------------------------------------------------------------------------------------------------------------------------------------------------------------------------------|
|                                                                   |                                           |                                                                                                                                                                                                                                                                                                  |                                                                                            | decrease in hematocrit of at least 20%, and/or rehospitalization for bleeding within 7 days of discharge.                                                                                                             |
| Lim et al., 2013<br>(Korea)<br>Jadad score: n/a                   | Hematochezia                              | ≤ 24 hours of admission                                                                                                                                                                                                                                                                          | None (study compared enema vs PEG groups, they were combined for the purpose of our study) | Not specified                                                                                                                                                                                                         |
| Smoot et al., 2003 <sup>9</sup><br>(USA)<br>Jadad score: n/a      | Diverticular hemorrhage                   | Included as per definition above:<br>Not defined in methods.<br>Colonoscopies were performed a mean of 18 ± 11 hours after admission.<br>21 patients (27%) had the index colonoscopy within 12 hours, 39 patients (50%) between 12 and 24 hours, and 18 patients (23%) 24 hours after admission. | None                                                                                       | Not specified                                                                                                                                                                                                         |
| Lin et al., 2011<br>(Taiwan)<br>Jadad score: n/a                  | Acute LGIB                                | ≤ 24 hours (after the onset of bleeding)                                                                                                                                                                                                                                                         | None                                                                                       | Not specified                                                                                                                                                                                                         |
| Ishii et al., 2012 <sup>10</sup><br>(Japan)<br>Jadad score: n/a   | Colonic diverticular hemorrhage           | 6 to 12 hours after hospitalization or the diagnosis of hematochezia and within 1 hour after clearance of stool and clots                                                                                                                                                                        | None                                                                                       | clinical evidence of recurrent lower GI bleeding within 30 days after initial treatment,                                                                                                                              |
| Navaneethan et al., 2014 <sup>11</sup><br>(USA)<br>Jadad score: 8 | Lower GI bleeding                         | ≤ 24 hours of admission                                                                                                                                                                                                                                                                          | Delayed colonoscopy (>24 hours)                                                            | Not specified                                                                                                                                                                                                         |
| Niikura et al., 2015<br>(Japan)<br>Jadad score: 9                 | Acute, continuous, or severe hematochezia | ≤ 24 hours                                                                                                                                                                                                                                                                                       | 24-48 hours and >48 hours                                                                  | significant amount of fresh bloody or wine-colored stool (>200 mL) without lower abdominal pain after discharge and was evaluated by colonoscopy with or without multidetector computed tomography wherever possible. |
| Nagata et al., 2016<br>(Japan)                                    | Acute Lower GI Bleeding                   | ≤ 24 hours of admission                                                                                                                                                                                                                                                                          | Elective endoscopy (>24 hours after hospital admission)                                    | significant amounts of fresh bloody or wine-colored stools after index                                                                                                                                                |

|                                                                |                                         |                                        |                                   |                                                                                                                                                     |
|----------------------------------------------------------------|-----------------------------------------|----------------------------------------|-----------------------------------|-----------------------------------------------------------------------------------------------------------------------------------------------------|
| Jadad score: 9                                                 |                                         |                                        |                                   | colonoscopy with unstable vital signs, systolic blood pressure $\geq 90$ mm Hg or pulse $\geq 110$ beats/min, and/or the need for blood transfusion |
| Jensen et al., 2016<br>Abstract<br>Jadad score: n/a            | Severe hematochezia and diverticulosis* | As reported in previous included study | None                              | Not specified                                                                                                                                       |
| Vitale et al., 2016<br>(Italy)<br>Abstract<br>Jadad score: n/a | Lower GI Bleeding                       | $\leq 24$ hours                        | None                              | Not specified                                                                                                                                       |
| Hassan et al., 2016<br>(USA)<br>Abstract<br>Jadad score: 5     | Diverticular hemorrhage                 | $\leq 24$ hours of admission           | Elective endoscopy ( $>24$ hours) | Not specified                                                                                                                                       |

LGIB: lower GI bleed; RCT: randomized controlled trial ; n/a: not applicable

\* Standard care algorithm. "Technetium RBC scanning was performed on patients with suspected active bleeding while those without active bleeding had an elective colonoscopy. Patients with a positive technetium scan went to visceral angiography while those with a negative scan had an elective colonoscopy. Active bleeding on angiography was treated. All patients receiving angiography (whether positive or negative) had an elective colonoscopy."

## Appendix – 1 Search String

### Search Strategy adapted to Embase and Medline

---

- 1 Gastrointestinal Hemorrhage/
- 2 (gastrointestinal adj5 bleed\$).tw.
- 3 (gastrointestinal adj5 hemorrhag\$).tw.
- 4 (gastrointestinal adj5 haemorrhag\$).tw.
- 5 (fecal adj1 hemoglobin).tw.
- 6 (GI adj25 bleed\$).tw.
- 7 LGIB.tw.
- 8 or/1-7
- 9 (Urgent\$ adj5 colonos\$).tw.
- 10 (Emergenc\$ adj5 colonos\$).tw.
- 11 (<'24' adj5 colonos\$).tw.
- 12 (early adj5 colonos\$).tw.
- 13 or/9-12
- 14 8 and 13

## Appendix – 2 Cochrane risk bias tool

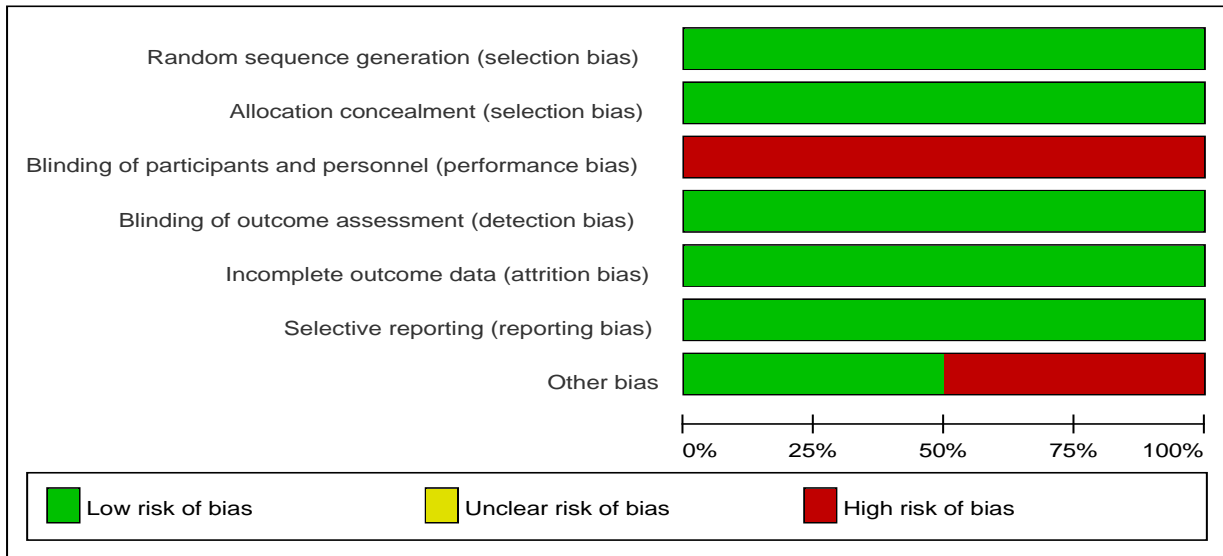

### Appendix 3 - GRADE

| Quality assessment          |                       |              |               |              |                      |                      | № of patients  |                | Effect                           |                                                          | Quality               | Importance |
|-----------------------------|-----------------------|--------------|---------------|--------------|----------------------|----------------------|----------------|----------------|----------------------------------|----------------------------------------------------------|-----------------------|------------|
| № of studies                | Study design          | Risk of bias | Inconsistency | Indirectness | Imprecision          | Other considerations | Early          | Control        | Relative (95% CI)                | Absolute (95% CI)                                        |                       |            |
| Overall rebleeding rate     |                       |              |               |              |                      |                      |                |                |                                  |                                                          |                       |            |
| 2                           | observational studies | not serious  | not serious   | not serious  | serious <sup>a</sup> | none                 | 58/381 (15.2%) | 80/551 (14.5%) | <b>OR 0.89</b><br>(0.49 to 1.94) | <b>14 fewer per 1,000</b><br>(from 68 fewer to 103 more) | ⊕○○○<br>○<br>VERY LOW | CRITICAL   |
| Mortality (all causes)      |                       |              |               |              |                      |                      |                |                |                                  |                                                          |                       |            |
| 6                           | observational studies | not serious  | not serious   | not serious  | serious <sup>a</sup> | none                 | 7/371 (1.9%)   | 5/538 (0.9%)   | <b>OR 0.89</b><br>(0.35 to 2.31) | <b>1 fewer per 1,000</b><br>(from 6 fewer to 12 more)    | ⊕○○○<br>○<br>VERY LOW | CRITICAL   |
| Mortality (Related to LGIB) |                       |              |               |              |                      |                      |                |                |                                  |                                                          |                       |            |
| 4                           | observational studies | not serious  | not serious   | not serious  | serious <sup>a</sup> | none                 | 1/184 (0.5%)   | 3/338 (0.9%)   | <b>OR 0.61</b><br>(0.12 to 3.23) | <b>3 fewer per 1,000</b><br>(from 8 fewer to 19 more)    | ⊕○○○<br>○<br>VERY LOW | CRITICAL   |
| Surgery                     |                       |              |               |              |                      |                      |                |                |                                  |                                                          |                       |            |

| Quality assessment                           |                       |                      |               |              |                      |                      | № of patients   |                 | Effect                         |                                                       | Quality               | Importance |
|----------------------------------------------|-----------------------|----------------------|---------------|--------------|----------------------|----------------------|-----------------|-----------------|--------------------------------|-------------------------------------------------------|-----------------------|------------|
| № of studies                                 | Study design          | Risk of bias         | Inconsistency | Indirectness | Imprecision          | Other considerations | Early           | Control         | Relative (95% CI)              | Absolute (95% CI)                                     |                       |            |
| 5                                            | observational studies | not serious          | not serious   | not serious  | serious <sup>a</sup> | none                 | 16/306 (5.2%)   | 19/302 (6.3%)   | <b>OR 0.78</b> (0.39 to 1.55)  | <b>13 fewer per 1,000</b> (from 31 more to 37 fewer)  | ⊕○○○<br>○<br>VERY LOW | IMPORTANT  |
| Definite cause of Acute LGIB (including SHR) |                       |                      |               |              |                      |                      |                 |                 |                                |                                                       |                       |            |
| 6                                            | observational studies | serious <sup>b</sup> | not serious   | not serious  | serious <sup>a</sup> | none                 | 147/486 (30.2%) | 71/579 (12.3%)  | <b>OR 4.12</b> (2.00 to 8.49)  | <b>243 more per 1,000</b> (from 96 more to 420 more)  | ⊕○○○<br>○<br>VERY LOW | IMPORTANT  |
| Definite cause of Acute LGIB                 |                       |                      |               |              |                      |                      |                 |                 |                                |                                                       |                       |            |
| 6                                            | observational studies | serious <sup>b</sup> | not serious   | not serious  | serious <sup>a</sup> | none                 | 199/347 (57.3%) | 175/449 (39.0%) | <b>OR 2.94</b> (0.81 to 10.64) | <b>263 more per 1,000</b> (from 49 fewer to 482 more) | ⊕○○○<br>○<br>VERY LOW | IMPORTANT  |

CI: Confidence interval; OR: Odds ratio

a. low sample size

b. Heterogeneity noted



1. Green BT, Rockey DC, Portwood G, et al. Urgent colonoscopy for evaluation and management of acute lower gastrointestinal hemorrhage: a randomized controlled trial. *The American journal of gastroenterology* 2005;100:2395-402.
2. Laine L, Shah A. Randomized trial of urgent vs. elective colonoscopy in patients hospitalized with lower GI bleeding. *The American journal of gastroenterology* 2010;105:2636-41; quiz 42.
3. Jensen DM, Machicado GA, Jutabha R, Kovacs TO. Urgent colonoscopy for the diagnosis and treatment of severe diverticular hemorrhage. *The New England journal of medicine* 2000;342:78-82.
4. Repaka A, Atkinson MR, Faulx AL, et al. Immediate unprepared hydroflush colonoscopy for severe lower GI bleeding: a feasibility study. *Gastrointestinal endoscopy* 2012;76:367-73.
5. Albeldawi M, Ha D, Mehta P, et al. Utility of urgent colonoscopy in acute lower gastro-intestinal bleeding: a single-center experience. *Gastroenterology report* 2014;2:300-5.
6. Angtuaco TL, Reddy SK, Drapkin S, Harrell LE, Howden CW. The utility of urgent colonoscopy in the evaluation of acute lower gastrointestinal tract bleeding: a 2-year experience from a single center. *The American journal of gastroenterology* 2001;96:1782-5.
7. Bloomfeld RS, Rockey DC, Shetzline MA. Endoscopic therapy of acute diverticular hemorrhage. *The American journal of gastroenterology* 2001;96:2367-72.
8. Strate LL, Syngal S. Predictors of utilization of early colonoscopy vs. radiography for severe lower intestinal bleeding. *Gastrointestinal endoscopy* 2005;61:46-52.
9. Smoot RL, Gostout CJ, Rajan E, et al. Is early colonoscopy after admission for acute diverticular bleeding needed? *The American journal of gastroenterology* 2003;98:1996-9.
10. Ishii N, Setoyama T, Deshpande GA, et al. Endoscopic band ligation for colonic diverticular hemorrhage. *Gastrointestinal endoscopy* 2012;75:382-7.
11. Navaneethan U, Njei B, Venkatesh PG, Sanaka MR. Timing of colonoscopy and outcomes in patients with lower GI bleeding: a nationwide population-based study. *Gastrointestinal endoscopy* 2014;79:297-306 e12.
